# Supplementary material for: Trends in Prescription Opioid Use in Motor Vehicle Crash Injuries in the United States: 2014–2018
Source: MDPI journal article supplement (doi:10.3390/ijerph192114445), 2022-11-04
Supplement: s1 [file s1]

### Supplementary Materials

**Table S1.** Summary of Emergency Department visits for motor vehicle crashes (MVC) with or without the involvement of prescription opioids.

|                                                                  | Total MVC Injuries<br>(N = 142,204) | MVC Injuries Involving Opioids<br>(N = 27,275) |             | MVC Injuries Not Involving Opioids<br>(N = 114,929) |             | <i>p</i> values |
|------------------------------------------------------------------|-------------------------------------|------------------------------------------------|-------------|-----------------------------------------------------|-------------|-----------------|
|                                                                  | N                                   | N or Mean                                      | Row % or SD | N or Mean                                           | Row % or SD |                 |
| Year of injuries                                                 |                                     |                                                |             |                                                     |             | <0.001          |
| 2014                                                             | 20,818                              | 5060                                           | 24%         | 15,758                                              | 76%         |                 |
| 2015                                                             | 33,452                              | 7653                                           | 23%         | 25,799                                              | 77%         |                 |
| 2016                                                             | 36,350                              | 7168                                           | 20%         | 29,182                                              | 80%         |                 |
| 2017                                                             | 27,673                              | 4538                                           | 16%         | 23,135                                              | 84%         |                 |
| 2018                                                             | 23,911                              | 2856                                           | 12%         | 21,055                                              | 88%         |                 |
| Centers for Disease Control and Prevention opioid use guidelines |                                     |                                                |             |                                                     |             | <0.001          |
| After (>= March 2016)                                            | 82,526                              | 13,441                                         | 16%         | 69,085                                              | 84%         |                 |
| Before (< March 2016)                                            | 59,678                              | 13,834                                         | 23%         | 45,844                                              | 77%         |                 |
| Age in years                                                     | 142,204                             | 41                                             | 15          | 38                                                  | 15          | <0.001          |
| Age group (years)                                                |                                     |                                                |             |                                                     |             | <0.001          |
| 18-20                                                            | 16,557                              | 1876                                           | 11%         | 14,681                                              | 89%         |                 |
| 21-24                                                            | 20,277                              | 2908                                           | 14%         | 17,369                                              | 86%         |                 |
| 25-34                                                            | 29,205                              | 4986                                           | 17%         | 24,219                                              | 83%         |                 |
| 35-44                                                            | 25,817                              | 5630                                           | 22%         | 20,187                                              | 78%         |                 |
| 45-54                                                            | 25,601                              | 6058                                           | 24%         | 19,543                                              | 76%         |                 |
| 55-65                                                            | 20,308                              | 4949                                           | 24%         | 15,359                                              | 76%         |                 |
| > 65                                                             | 4,439                               | 868                                            | 20%         | 3,571                                               | 80%         |                 |
| Sex                                                              |                                     |                                                |             |                                                     |             | 0.829           |
| Male                                                             | 60,799                              | 11,645                                         | 19%         | 49,154                                              | 81%         |                 |
| Female                                                           | 81,405                              | 15,630                                         | 19%         | 65,775                                              | 81%         |                 |
| Insurance type                                                   |                                     |                                                |             |                                                     |             | <0.001          |
| Fee for Service                                                  | 123,541                             | 23,921                                         | 19%         | 99,620                                              | 81%         |                 |
| Encounter                                                        | 18,663                              | 3354                                           | 18%         | 15,309                                              | 82%         |                 |
| Relation to Employee                                             |                                     |                                                |             |                                                     |             | <0.001          |
| Employee                                                         | 81,657                              | 16,362                                         | 20%         | 65,295                                              | 80%         |                 |
| Spouse                                                           | 25,129                              | 6225                                           | 25%         | 18,904                                              | 75%         |                 |
| Child/Other                                                      | 35,418                              | 4688                                           | 13%         | 30,730                                              | 87%         |                 |
| Employment Status                                                |                                     |                                                |             |                                                     |             | <0.001          |
| Active Full Time                                                 | 106,529                             | 19,682                                         | 19%         | 86,847                                              | 82%         |                 |
| Not Active Full Time                                             | 12,244                              | 2452                                           | 20%         | 9,792                                               | 80%         |                 |
| Other/Unknown                                                    | 23,431                              | 5141                                           | 22%         | 18,290                                              | 78%         |                 |
| Region                                                           |                                     |                                                |             |                                                     |             | <0.001          |
| Northeast Region                                                 | 14,041                              | 1503                                           | 11%         | 12,538                                              | 89%         |                 |

|                               |         |        |     |         |        |
|-------------------------------|---------|--------|-----|---------|--------|
| North-Central Region          | 33,837  | 6002   | 18% | 27,835  | 82%    |
| South Region                  | 67,480  | 14,287 | 21% | 53,193  | 79%    |
| West Region                   | 26,846  | 5483   | 20% | 21,363  | 80%    |
| Metropolitan Statistical Area |         |        |     |         | <0.001 |
| Yes                           | 125,199 | 23,696 | 19% | 101,503 | 81%    |
| No                            | 17,005  | 3579   | 21% | 13,426  | 79%    |

**Table S2.** Prevalence and prevalence ratios for prescription opioids in motor vehicle crash (MVC) injuries before vs. after the CDC guidelines, considering transitory periods, US, 2014–2018.

| Transitory Period | Before vs. after the CDC Guidelines | Number of MVC Injuries | Percentage of MVC Injuries Involving Opioids | Prevalence Ratio (95% CI) |
|-------------------|-------------------------------------|------------------------|----------------------------------------------|---------------------------|
| 0                 | Before                              | 59,678                 | 23%                                          | 1 (Reference)             |
|                   | After                               | 82,526                 | 16%                                          | 0.71 (0.70, 0.73)         |
| 3 months          | Before                              | 59,678                 | 23%                                          | 1 (Reference)             |
|                   | After                               | 73,976                 | 16%                                          | 0.69 (0.70, 0.71)         |
| 6 months          | Before                              | 59,678                 | 23%                                          | 1 (Reference)             |
|                   | After                               | 64,668                 | 15%                                          | 0.67 (0.65, 0.68)         |
| 12 months         | Before                              | 59,678                 | 23%                                          | 1 (Reference)             |
|                   | After                               | 48,002                 | 14%                                          | 0.62 (0.60, 0.64)         |

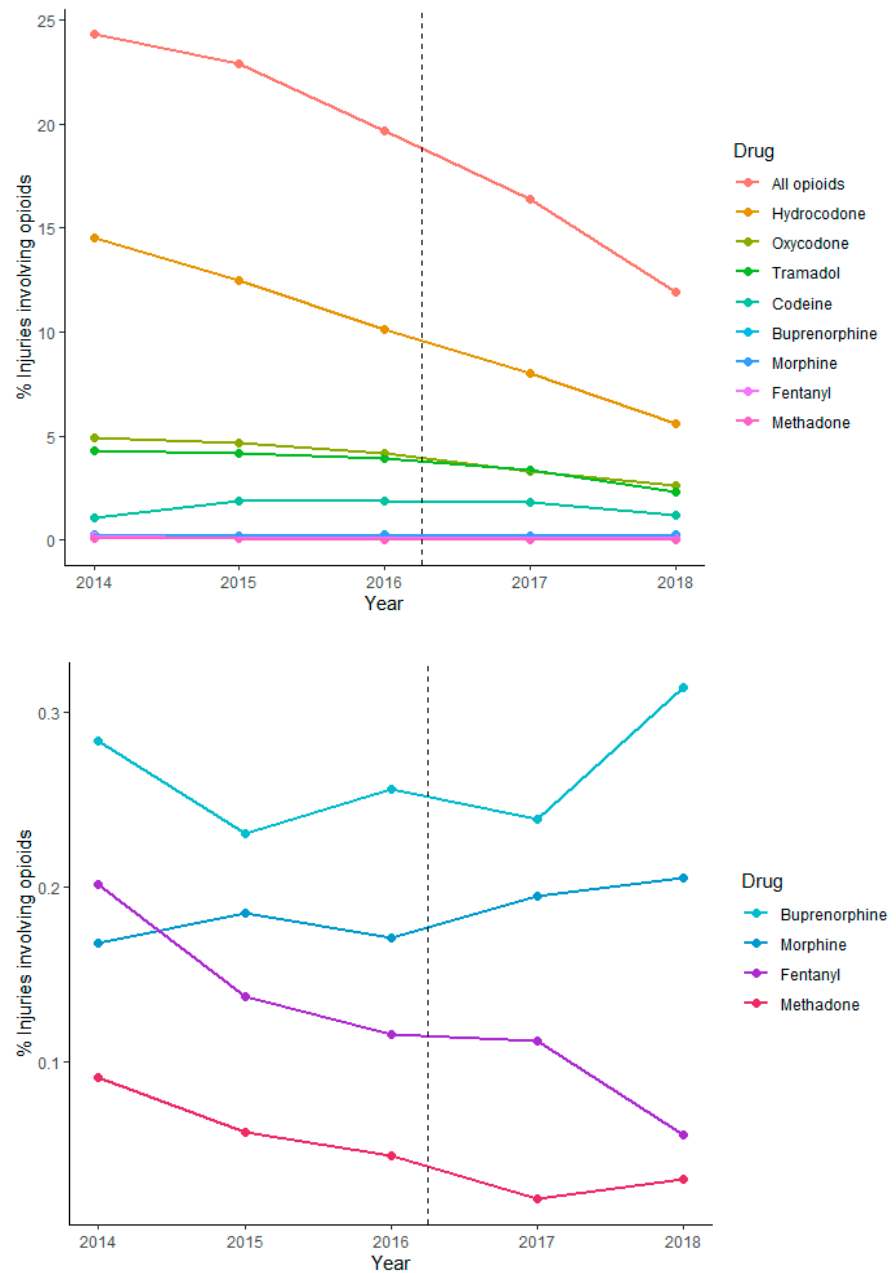

**Figure S1.** The prevalence of common prescription opioids in motor vehicle crash (MVC) injuries, 2014–2018. Note: the top panel shows all common opioids and the bottom panel shows the opioids with a prevalence < 1%. The vertical dotted line indicates the 2016 release of CDC Guidelines for Prescribing Opioids for Chronic Pain [12].

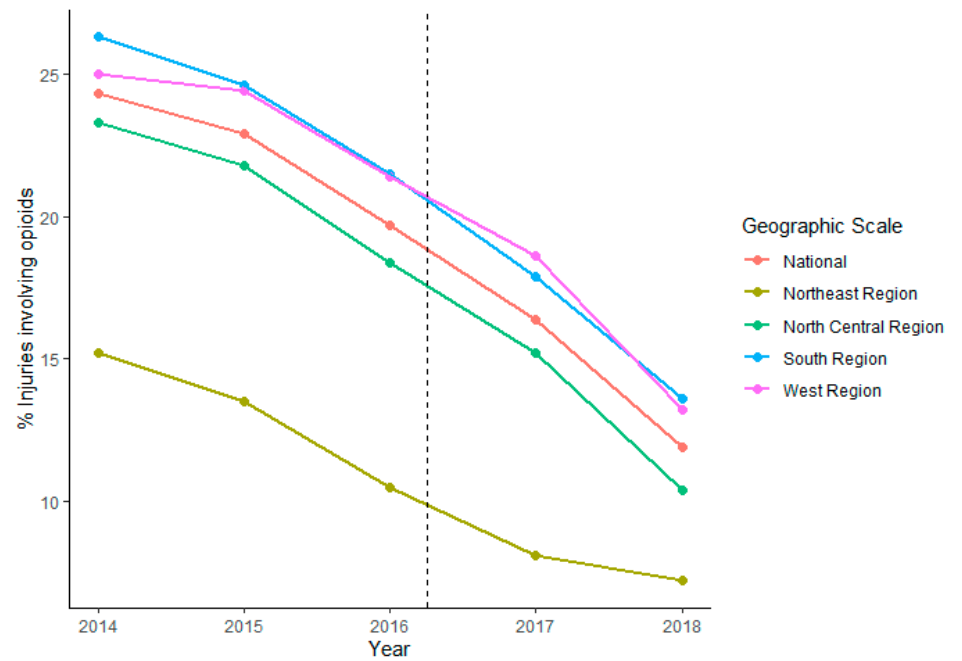

**Figure S2.** The prevalence of prescription opioids in MVC injuries at national and regional levels, US, 2014–2018. The vertical dotted line indicates the 2016 release of CDC Guidelines for Prescribing Opioids for Chronic Pain [12].
